# Supplementary material for: Stress Effect of Food Matrices on Viability of Probiotic Cells during Model Digestion
Source: MDPI journal article supplement (doi:10.3390/microorganisms9081625), 2021-07-30
Supplement: s1 [file s1]

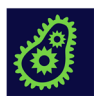

Article

# Stress Effect of Food Matrices on Viability of Probiotic Cells during Model Digestion

Petra Matouskova <sup>1</sup>, Julie Hoova <sup>1</sup>, Petr Rysavka <sup>2</sup> and Ivana Marova <sup>1,\*</sup>

<sup>1</sup> Faculty of Chemistry, Brno University of Technology, Purkynova 118, 61200 Brno, Czech Republic; matouskova@fch.vut.cz (P.M.); xchoova@fch.vut.cz (J.H.)

<sup>2</sup> Pharmaceutical Biotechnology, Ltd., Slezska 949/32, 12000 Prague, Czech Republic; rysavka.petr@seznam.cz

\* Correspondence: marova@fch.vut.cz; Tel.: +420-541149419

---

List of Figures:

**Figure S1:** Bacteria *Lactobacillus acidophilus*, *Bifidobacterium breve* and commercial probiotic mixture cultivated for 48 hours in MRS agar

**Figure S2.** Viability of probiotics analyzed by flow cytometry – results of analysis of commercial probiotic mixture incubated in water medium.

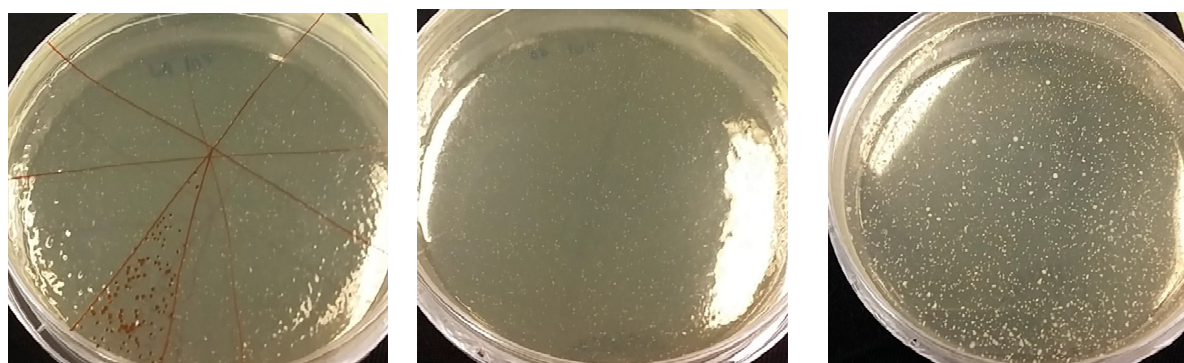*Lactobacillus acidophilus**Bifidobacterium breve*

Commercial probiotic mixture

**Figure S1:** Bacteria *Lactobacillus acidophilus*, *Bifidobacterium breve* and commercial probiotic mixture cultivated for 48 hours in MRS agar

Note: During analysis of viability by cultivation method, cells in model and real samples were diluted to approx.  $10^4$  cells, placed on Petri dish and over-layered by agar medium to reduce oxygen presence.

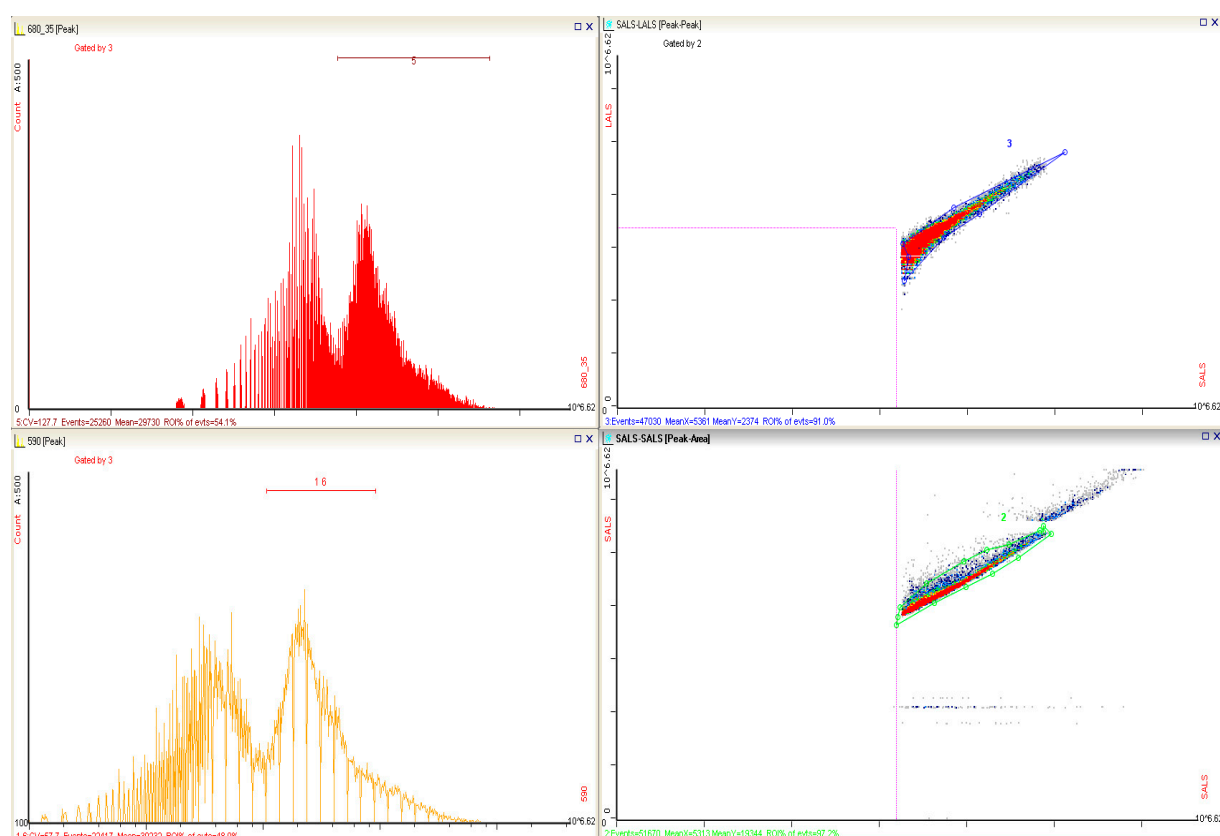

**Figure S2.** Viability of probiotics analyzed by flow cytometry – results of analysis of commercial probiotic mixture incubated in water medium.
